# Supplementary material
Source: MDPI journal article supplement (https://www.mdpi.com/2079-6412/8/4/150)
Supplement: s1 [file s1]

**Supplementary Material**

Surface Figure Measurement


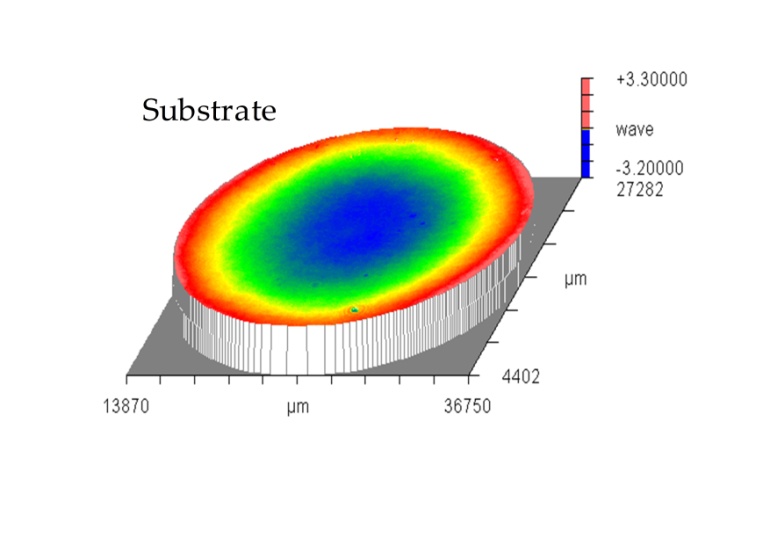

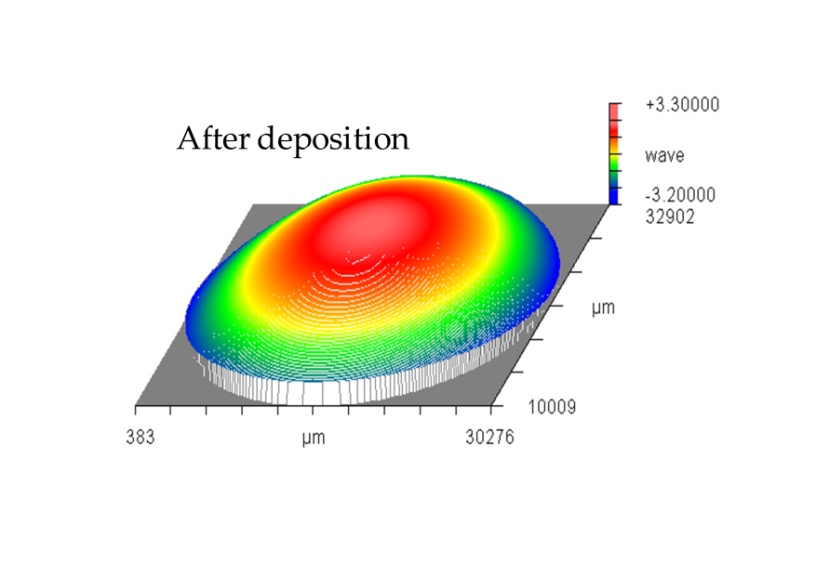


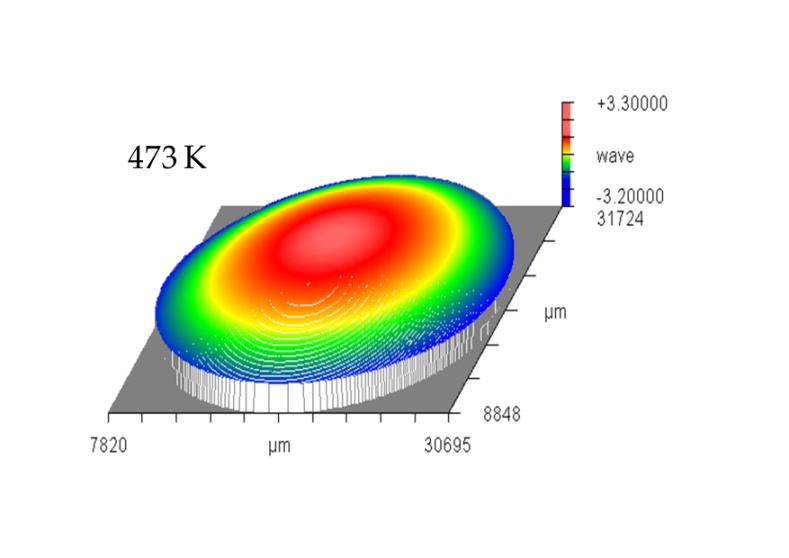

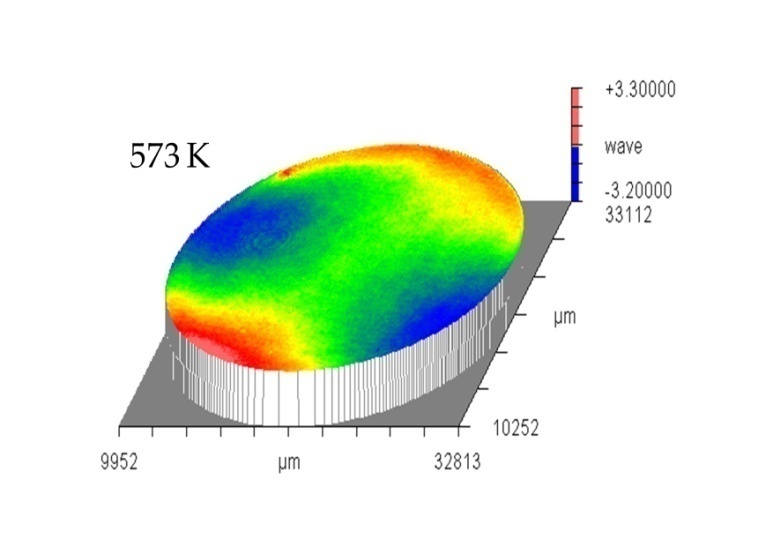


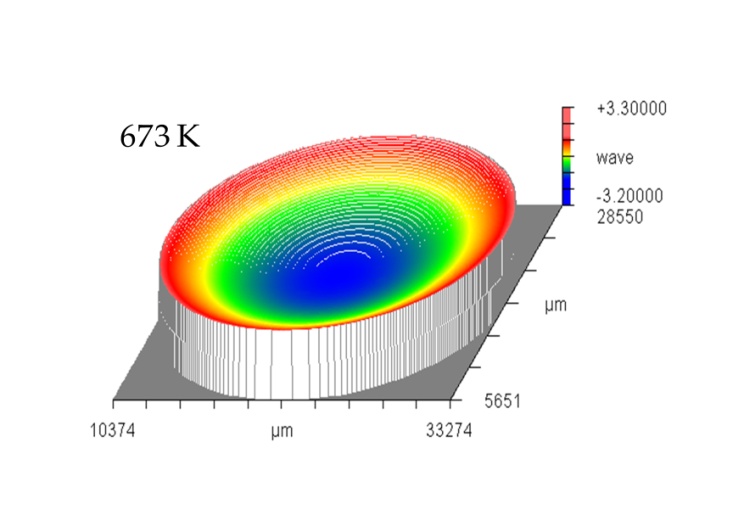

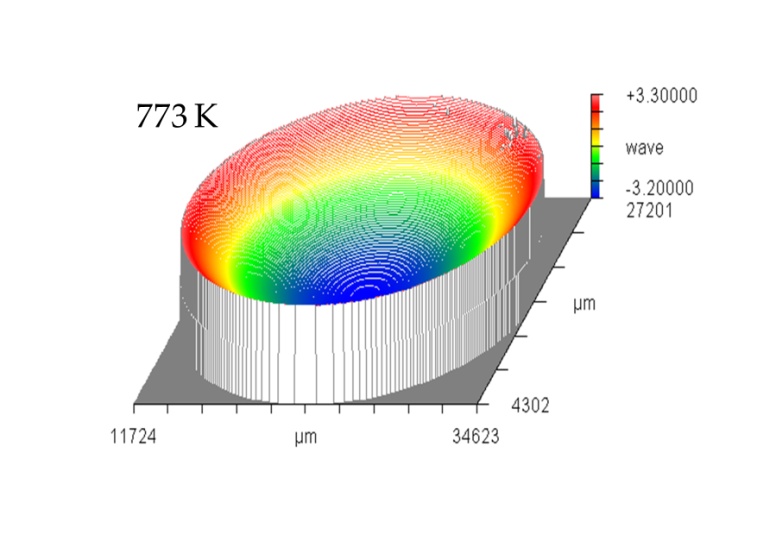


**Figure S1.** Surface figure of Ta2O5 films on fused silica before deposition, after deposition, and after annealing treatments at various temperatures.

Surface Chemistry

To determine the surface chemistry of Ta2O5 films, a Thermo Scientific ESCALAB 250Xi X-ray photoelectron spectrometer was used to perform the measurements. The X-ray radiation was the monochromatic Al Kα line; the X-ray spot size and the take-off angle were 0.8 mm and 90°, respectively. The satellite spectra were recorded with pass energy of 20 eV and an energy step of 0.1 eV. All tests were performed in the XPS chamber at a vacuum of 4–7 × 10−7 Pa.

To analyze the XPS data, all spectra were calibrated with respect to the C 1s peak according to the as-deposited sample (Figure S2). The Shirley routine was used to remove the background, and a Gaussian function was used to fit and process each satellite peak for all samples (Figures S3 and S4).


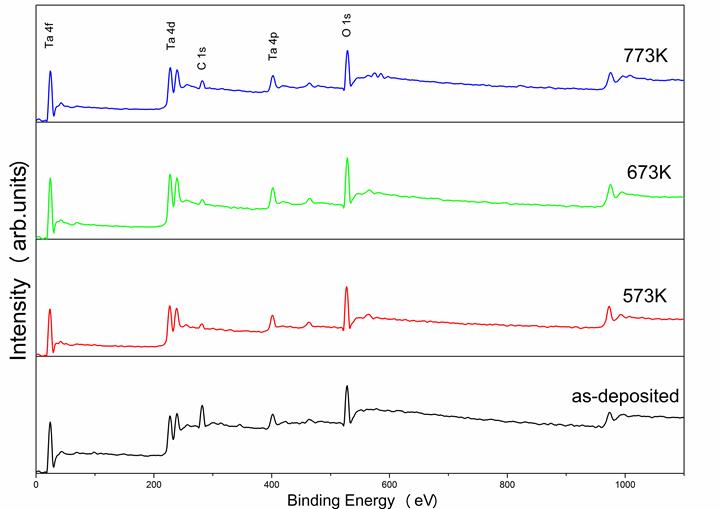


**Figure S2.** XPS survey spectra of Ta2O5 films under various annealing temperatures.


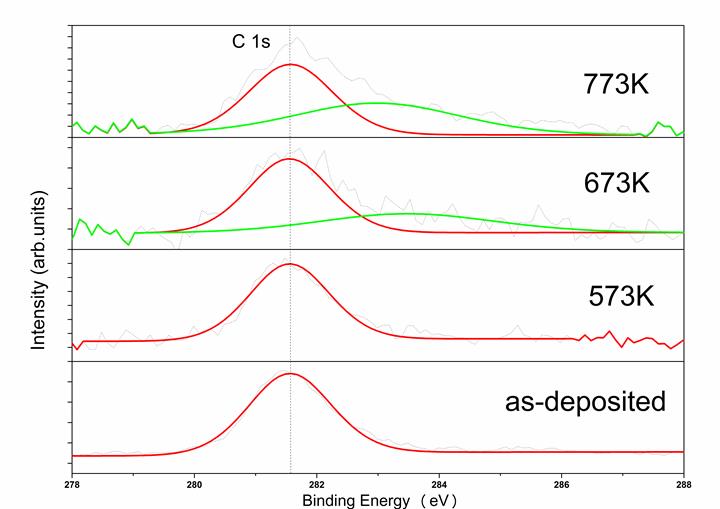


**Figure S3.** XPS spectra of carbon (C 1*s*, adsorptive molecule) with satellite peaks under various annealing temperatures. Main peaks of 573K, 673K, and 773K annealed samples were calibrated at the same binding energy according to the as-deposited sample.


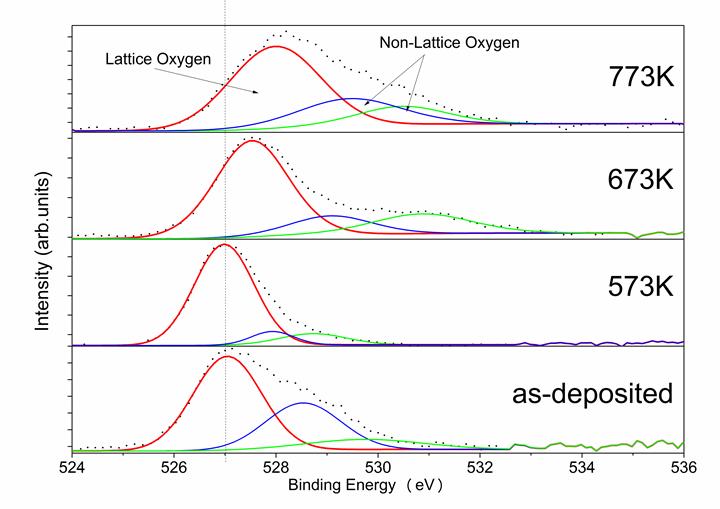


**Figure S4.** XPS spectra of oxygen (O 1s) with satellite peaks under various annealing temperatures. Peaks were calibrated with C 1s peaks. These spectra show that the O 1s peaks (especially for lattice oxygen) move to higher binding energy with an increase of the annealing temperature.

**Table S1.** O/Ta ratio of Ta2O5 films based on XPS survey spectra. The O/Ta ratio is observed from compositions by normalizing the area under the curve of Figure S2 using the sensitivity factors.

| Temperature/K | **O/Ta ratio** | |
| --- | --- | --- |
| **This work** | **Report [16]** |
| as-deposited | 2.2 | 2.42 |
| 573 | 2.2 | – |
| 673 | 2.5 | – |
| 773 | 2.5 | – |
| 873 | – | 2.50 |
| 973 | – | 2.50 |
